# Supplementary material for: Examining Social Equity in the Co-Management of Terrestrial Protected Areas: Perceived Fairness of Local Communities in Giant Panda National Park, China
Source: MDPI journal article supplement (doi:10.3390/land11101624), 2022-09-22
Supplement: s1 [file s1]

## **Supplementary Materials**

This document is a supplement to the article titled “Social Equity in Protected Areas Co-management: Perceived Fairness of Local Residents in Giant Panda National Park, China”

*Supplementary Materials - Table S 1 - Survey questions related to the demographics and characteristics of local residents*

| <b>Survey questions related to the demographics and characteristics of local residents</b> |                                                    |                                                                                                                                                    |
|--------------------------------------------------------------------------------------------|----------------------------------------------------|----------------------------------------------------------------------------------------------------------------------------------------------------|
| <i>Topic</i>                                                                               | <i>Survey Questions (Survey)</i>                   | <i>Potential Responses</i>                                                                                                                         |
| Gender                                                                                     | Interviewee's gender?                              | Male/female                                                                                                                                        |
| Age                                                                                        | What is your age group?                            | 20-30/30-40/40-50/50-60/60+years old                                                                                                               |
| Professional                                                                               | What is your occupation?                           | Farmers, workers, merchants, other                                                                                                                 |
| Education                                                                                  | What is your highest level of education completed? | No school/primary school/junior school/high school, technical secondary school, vocational high school /bachelor's degree, junior college or above |
| administrative village                                                                     | Which village do you live in?                      | Luoyigou village, Yinping village, Weiba village, Dongqiao village, Suyang Village、 other                                                          |
| The live time                                                                              | How many years have you lived in this village?     | 0-10、 10-20、 >20years                                                                                                                              |
| Household size                                                                             | How many people live in your household?            | List                                                                                                                                               |
| Household migrant workers                                                                  | How many people in your family work outside?       | List                                                                                                                                               |
| Annual household income                                                                    | What is your family's total annual income?         | <1/1-3/3-6/6-10/>10(10000RMB)                                                                                                                      |
| Household source of income                                                                 | What is your family's main source of income?       | Animal Husbandry and Plantation / Tourism /Forester/ Local workers/ Foreign workers/ other                                                         |

*Supplementary Materials - Table S 2 - Survey questions related to participated types of co-management local residents*

| Survey questions related to participated types of co-management local residents |                                                                                                                         |                            |
|---------------------------------------------------------------------------------|-------------------------------------------------------------------------------------------------------------------------|----------------------------|
| <i>Topic</i>                                                                    | <i>Survey Questions (Survey)</i>                                                                                        | <i>Potential Responses</i> |
| Instruction                                                                     | I participated in the energy transformation and other facilities renovation projects of the Giant Panda National Park . | Yes(1)/No(0)               |
|                                                                                 | I participated in the skills training and industry support organized by the Giant Panda National Park .                 | Yes(1)/No(0)               |
|                                                                                 | I participated in environmental educational activities of the Giant Panda National Park .                               | Yes(1)/No(0)               |
| Consultation                                                                    | I attended community-based Co-management meeting                                                                        | Yes(1)/No(0)               |
|                                                                                 | I participated in the consultation on the planning and policy making of the Giant Panda National Park                   | Yes(1)/No(0)               |
|                                                                                 | I was able to easily obtain about co-management information of the Giant Panda National Park                            | Yes(1)/No(0)               |
| Agreement                                                                       | I was participated in signing fire prevention and human-wildlife conflict compensation agreements                       | Yes(1)/No(0)               |
|                                                                                 | I was signed to participate in community-based co-management management                                                 | Yes(1)/No(0)               |
|                                                                                 | I participated in the bee farming and other cooperative benefit sharing.                                                | Yes(1)/No(0)               |
| Cooperation                                                                     | I participated in the fire prevention and forest patrolling work of the Giant Panda National Park                       | Yes(1)/No(0)               |
|                                                                                 | I was participated in enacting conservation rules                                                                       | Yes(1)/No(0)               |
|                                                                                 | I have accountability for some conservation affairs                                                                     | Yes(1)/No(0)               |

*Supplementary Materials - Table S 3 - Survey questions and responses related to recognitional, procedural and distributional equity*

| Recognitional Equity                    |                                                                                                                             |                                                                         |
|-----------------------------------------|-----------------------------------------------------------------------------------------------------------------------------|-------------------------------------------------------------------------|
| <i>Attribute</i>                        | <i>Survey Questions</i>                                                                                                     | <i>Potential Responses</i>                                              |
| Culture                                 | GPNP can respect our local culture and traditional customs                                                                  | Strongly disagree(1)/disagree(2)/not sure(3)/agree(4)/strongly agree(5) |
| Livelihood                              | GPNP imposes no negative impact on my original livelihood                                                                   | Strongly disagree(1)/disagree(2)/not sure(3)/agree(4)/strongly agree(5) |
| Legal and traditional rights            | GPNP can sincerely respect my legal and traditional rights                                                                  | Strongly disagree(1)/disagree(2)/not sure(3)/agree(4)/strongly agree(5) |
| Land ownership                          | I have no land ownership conflicts with GPNP                                                                                | Strongly disagree(1)/disagree(2)/not sure(3)/agree(4)/strongly agree(5) |
| Traditional knowledge                   | Community-based traditional knowledge can be effectively involved in the management of GPNP                                 | Strongly disagree(1)/disagree(2)/not sure(3)/agree(4)/strongly agree(5) |
| Procedural Equity                       |                                                                                                                             |                                                                         |
| <i>Attribute</i>                        | <i>Survey Questions (Survey)</i>                                                                                            | <i>Potential Responses</i>                                              |
| Decision making                         | I can fully express my opinion and effectively involved in the decision-making process of GPNP                              | Strongly disagree(1)/disagree(2)/not sure(3)/agree(4)/strongly agree(5) |
| Participation                           | GPNP has convenient channels and fair procedures to encourage local participation                                           | Strongly disagree(1)/disagree(2)/not sure(3)/agree(4)/strongly agree(5) |
| transparency                            | The information about conservation decisions and reasons for decisions are readily available                                | Strongly disagree(1)/disagree(2)/not sure(3)/agree(4)/strongly agree(5) |
| Accountability                          | I understand the responsibility of ATA, and knowing to whom to raise concerns to solve issues related to management actions | Strongly disagree(1)/disagree(2)/not sure(3)/agree(4)/strongly agree(5) |
| Free, prior and informed consent (FPIC) | When ATA issues plans and policies regarding to me, I will be informed in advance                                           | Strongly disagree(1)/disagree(2)/not sure(3)/agree(4)/strongly agree(5) |
| Distributional Equity                   |                                                                                                                             |                                                                         |
| <i>Attribute</i>                        | <i>Survey Questions (Survey)</i>                                                                                            | <i>Potential Responses</i>                                              |
| Conservation burdens                    | I fairly bear the responsibility of conservation in GPNP, compared to other local residents                                 | Strongly disagree(1)/disagree(2)/not sure(3)/agree(4)/strongly agree(5) |
| Ecological compensation                 | I am satisfied with the ecological compensation made by GPNP                                                                | Strongly disagree(1)/disagree(2)/not sure(3)/agree(4)/strongly agree(5) |
| Wildlife conflicts compensation         | I can easily get appropriate compensation from human-wildlife conflicts.                                                    | Strongly disagree(1)/disagree(2)/not sure(3)/agree(4)/strongly agree(5) |
| Benefits distribution                   | I can fairly get economic benefits from co-management, compared to other local residents                                    | Strongly disagree(1)/disagree(2)/not sure(3)/agree(4)/strongly agree(5) |
| Employment distribution                 | I can fairly get employment opportunities from ATA, compared to others                                                      | Strongly disagree(1)/disagree(2)/not sure(3)/agree(4)/strongly agree(5) |
| Combined Equity Scores                  |                                                                                                                             |                                                                         |

|                                            |                                                                                                                                                                             |                                                                                                                                        |
|--------------------------------------------|-----------------------------------------------------------------------------------------------------------------------------------------------------------------------------|----------------------------------------------------------------------------------------------------------------------------------------|
| Combined<br>Recognitional<br>Equity Score  | Combined responses to above questions related to culture, livelihood, legal and traditional rights, land ownership, traditional knowledge                                   | All individual items are first standardized on a scale of 1-5. Then add up all the items and average them                              |
| Combined<br>procedural<br>equity score     | Combined responses for all questions in procedural category including decision making, participation transparency, accountability,, free, prior and informed consent (FPIC) | All individual items are first standardized on a scale of 1-5. Then add up all the items and average them                              |
| Combined<br>distributional<br>equity scale | Combination of conservation burdens, ecological compensation, wildlife conflicts compensation, benefits distribution, employment distribution                               | All individual items are first standardized on a scale of 1-5. Then add up all the items and average them                              |
| Combined<br>Equity Score                   | Combination of recognitional, procedural, and distributional equity scores.                                                                                                 | The scores for the three entitlement classes are calculated by summing and averaging. This score is then normalized to a scale of 1-5. |

*Supplementary Materials - Table S 4 - Co-management activities in TGPNP (N=424)*

| Category     | Co-management Activities                                                                                                                                                                                                                                                                                                                                                                                                                                                                                                                                                |
|--------------|-------------------------------------------------------------------------------------------------------------------------------------------------------------------------------------------------------------------------------------------------------------------------------------------------------------------------------------------------------------------------------------------------------------------------------------------------------------------------------------------------------------------------------------------------------------------------|
| Instruction  | <p>1: Subsidize the construction of biogas digesters, wood-saving stoves and other energy conservation projects, and repair iron rope bridges and other infrastructure construction assistance.</p> <p>2: Promote the standardized operation of rural farmhouses and carry out training on standardized operation skills for rural tourism.</p> <p>3: Funding villages to carry out industrial support projects such as planting walnuts, konjac, livestock and poultry breeding.</p> <p>4: Carry out regular nature protection publicity and education activities.</p> |
| Consultation | <p>5: Establish community-based co-management committee and conduct regular working meetings.</p> <p>6: Hold regular consultation meetings on the planning and policy development of TGPNP.</p> <p>7: Post announcements and brochures through community columns to publicize information on community-based co-management work.</p>                                                                                                                                                                                                                                    |
| Agreement    | <p>8: Regularly hold on-site meetings to sign forest fire safety agreements.</p> <p>9: Develop compensation agreements for human-wildlife conflict.</p> <p>10: Formulation of community-based co-management agreements.</p> <p>11: Establishing a Chinese bee breeding cooperative.</p> <p>12: Establishment of persimmon cooperative.</p>                                                                                                                                                                                                                              |
| Cooperation  | <p>13: Establishment of forest protection joint defense team.</p> <p>14: Conduct regular conservation rule-making meetings.</p> <p>15: Regular recruitment of forest rangers.</p>                                                                                                                                                                                                                                                                                                                                                                                       |

*Supplementary Materials - Table S 5 - Descriptive summary of survey sample including the number and percentage of local residents participated in co-management types and activities (N=424)*

| Category     | Co-management Activities                                                  | Number<br>(participated) | Percentage<br>(%) |
|--------------|---------------------------------------------------------------------------|--------------------------|-------------------|
| Instruction  | A1 Energy transformation and other infrastructure building projects       | 316                      | 74.5              |
|              | A2 Skill training and industrial support activities                       | 153                      | 36.1              |
|              | A3 Environmental educational activities                                   | 239                      | 56.4              |
| Consultation | A4 Community-based co-management meetings                                 | 98                       | 23.1              |
|              | A5 Consultative meetings for planning and policy making                   | 84                       | 19.8              |
|              | A6 Easy access to co-management Information                               | 113                      | 26.7              |
| Agreement    | A7 Agreements of fire prevention and human-wildlife conflict compensation | 80                       | 18.9              |
|              | A8 Agreements of community-based co-management                            | 39                       | 9.2               |
|              | A9 Benefits sharing of bee farming and other cooperatives                 | 102                      | 24.1              |
| Cooperation  | A10 Fire prevention and forest patrolling work                            | 115                      | 27.1              |
|              | A11 Participation in enacting conservation rules                          | 47                       | 11.1              |
|              | A12 Accountability for some conservation affairs                          | 23                       | 5.4               |

*Supplementary Materials - Table S 6 - Descriptive summary of survey sample including quantity of co-management participation of local residents (N=424)*

| <b>Quantity of co-management participation</b> | <b>0</b> | <b>1</b> | <b>2</b> | <b>3</b> | <b>4</b> | <b>5</b> | <b>6</b> | <b>7</b> | <b>8</b> | <b>9</b> | <b>10</b> | <b>11</b> | <b>12</b> |
|------------------------------------------------|----------|----------|----------|----------|----------|----------|----------|----------|----------|----------|-----------|-----------|-----------|
| Number of people                               | 19       | 104      | 89       | 61       | 38       | 31       | 26       | 20       | 11       | 11       | 4         | 6         | 4         |
| Frequency (%)                                  | 4.5      | 24.5     | 21.0     | 14.4     | 9.0      | 7.3      | 6.1      | 4.7      | 2.6      | 2.6      | 0.9       | 1.4       | 0.9       |

*Supplementary Materials - Table S 7 - Descriptive summary of responses to all individual perceptions indicators. For each item the upper row indicates absolute number of responses, the lower number indicates the relative percentage on the total number of responses.*

| EQUITY CATEGORY                     | ITEM                                       | STRONGLY<br>DISAGREE | DISAGREE | NOT<br>SURE | AGREE | STRONGLY<br>AGREE |   |
|-------------------------------------|--------------------------------------------|----------------------|----------|-------------|-------|-------------------|---|
| <i><b>Recognitional Equity</b></i>  | Culture                                    | 8                    | 41       | 91          | 218   | 66                | N |
|                                     |                                            | 1.89                 | 9.67     | 21.46       | 51.42 | 15.57             | % |
|                                     | Livelihood                                 | 21                   | 59       | 47          | 227   | 70                | N |
|                                     |                                            | 4.95                 | 13.92    | 11.08       | 53.54 | 16.51             | % |
|                                     | Legal and traditional rights               | 31                   | 50       | 102         | 208   | 33                | N |
|                                     |                                            | 7.31                 | 11.79    | 24.06       | 49.06 | 7.78              | % |
|                                     | Land ownership                             | 16                   | 38       | 36          | 221   | 113               | N |
|                                     |                                            | 3.77                 | 8.96     | 8.49        | 52.12 | 26.65             | % |
|                                     | Traditional knowledge                      | 9                    | 36       | 193         | 162   | 24                | N |
|                                     |                                            | 2.12                 | 8.49     | 45.52       | 38.21 | 5.66              | % |
| <i><b>Procedural Equity</b></i>     | Decision making                            | 79                   | 121      | 91          | 110   | 23                | N |
|                                     |                                            | 18.63                | 28.54    | 21.46       | 25.94 | 5.42              | % |
|                                     | Participation                              | 98                   | 183      | 75          | 55    | 13                | N |
|                                     |                                            | 23.11                | 43.16    | 17.69       | 12.97 | 3.07              | % |
|                                     | Transparency                               | 75                   | 106      | 89          | 139   | 15                | N |
|                                     |                                            | 17.69                | 25.00    | 20.99       | 32.78 | 3.54              | % |
|                                     | Accountability                             | 64                   | 143      | 85          | 119   | 13                | N |
|                                     |                                            | 15.09                | 33.73    | 20.05       | 28.07 | 3.07              | % |
|                                     | Free, prior and informed<br>consent (FPIC) | 93                   | 151      | 66          | 103   | 11                | N |
|                                     |                                            | 21.93                | 35.61    | 15.57       | 24.29 | 2.59              | % |
| <i><b>Distributional Equity</b></i> | Conservation burdens                       | 14                   | 57       | 65          | 178   | 110               | N |
|                                     |                                            | 3.30                 | 13.44    | 15.33       | 41.98 | 25.94             | % |
|                                     | Ecological compensation                    | 75                   | 189      | 75          | 64    | 21                | N |
|                                     |                                            | 17.69                | 44.58    | 17.69       | 15.09 | 4.95              | % |
|                                     | Wildlife conflicts<br>compensation         | 121                  | 160      | 60          | 65    | 18                | N |
|                                     |                                            | 28.54                | 37.74    | 14.15       | 15.33 | 4.25              | % |
|                                     | Benefits distribution                      | 53                   | 102      | 177         | 79    | 13                | N |
|                                     |                                            | 12.50                | 24.06    | 41.75       | 18.63 | 3.07              | % |
|                                     | Employment distribution                    | 50                   | 121      | 142         | 90    | 21                | N |
|                                     |                                            | 11.79                | 28.54    | 33.49       | 21.23 | 4.95              | % |



*Supplementary Materials - Table S 8 - Correlation analysis between demographic characteristics and perceived fairness*

| Category                  | Analysis method               | recognitional equity      |                    | procedural equity         |                    | distributional equity     |                    | Combined social equity    |                    |
|---------------------------|-------------------------------|---------------------------|--------------------|---------------------------|--------------------|---------------------------|--------------------|---------------------------|--------------------|
|                           |                               | F/correlation coefficient | P/ Sig. (2-tailed) |
| Gender                    | one-way ANOVA                 | 0.794                     | 0.373              | 0.057                     | 0.811              | 0.267                     | 0.606              | 0.000                     | 0.994              |
| Age                       | Spearman correlation analysis | -.107*                    | 0.028              | -.129**                   | 0.008              | -.134**                   | 0.006              | -.167**                   | 0.001              |
| Professional              | one-way ANOVA                 | 0.890                     | 0.446              | 0.529                     | 0.663              | 1.061                     | 0.365              | 0.741                     | 0.528              |
| Education                 | Spearman correlation analysis | .216**                    | 0.000              | .222**                    | 0.000              | .206**                    | 0.000              | .278**                    | 0.000              |
| Villages                  | one-way ANOVA                 | 5.560                     | 0.000              | 2.128                     | 0.077              | 2.095                     | 0.081              | 2.111                     | 0.079              |
| Residency years           | Spearman correlation analysis | -0.016                    | 0.737              | -0.042                    | 0.385              | 0.057                     | 0.242              | -0.012                    | 0.810              |
| Household size            | Spearman correlation analysis | 0.126**                   | 0.010              | -0.024                    | 0.624              | 0.030                     | 0.534              | 0.058                     | 0.237              |
| Household migrant workers | Spearman correlation analysis | -0.011                    | 0.825              | -0.057                    | 0.242              | -0.052                    | 0.287              | -0.033                    | 0.493              |
| Annual household income   | Spearman correlation analysis | 0.151**                   | 0.002              | .110*                     | 0.024              | .184**                    | 0.000              | .190**                    | 0.000              |
| Farming                   | one-way ANOVA                 | 0.613                     | 0.434              | 0.109                     | 0.741              | 1.302                     | 0.254              | 0.346                     | 0.557              |
| Tourism                   | one-way ANOVA                 | 2.655                     | 0.104              | 1.489                     | 0.223              | 14.105                    | 0.000              | 7.630                     | 0.006              |
| Forestry                  | one-way ANOVA                 | 0.384                     | 0.536              | 23.937                    | 0.000              | 20.835                    | 0.000              | 16.910                    | 0.000              |
| Local employment          | one-way ANOVA                 | 3.023                     | 0.083              | 0.000                     | 0.990              | 3.560                     | 0.060              | 1.977                     | 0.160              |
| Nonlocal employment       | one-way ANOVA                 | 0.230                     | 0.632              | 0.735                     | 0.392              | 1.448                     | 0.229              | 0.571                     | 0.450              |

*Supplementary Materials - Table S 9 - Correlation analysis of co-management participation type and fairness perception*

| Category                                  | Analysis method               | recognitional equity    |                 | procedural equity       |                 | distributional equity   |                 | Combined social equity  |                 |
|-------------------------------------------|-------------------------------|-------------------------|-----------------|-------------------------|-----------------|-------------------------|-----------------|-------------------------|-----------------|
|                                           |                               | correlation coefficient | Sig. (2-tailed) |
| Instruction                               | Spearman correlation analysis | .190**                  | 0.000           | .278**                  | 0.000           | .321**                  | 0.000           | .333**                  | 0.000           |
| Consultation                              | Spearman correlation analysis | .177**                  | 0.000           | .389**                  | 0.000           | .325**                  | 0.000           | .399**                  | 0.000           |
| Agreement                                 | Spearman correlation analysis | .102*                   | 0.035           | .216**                  | 0.000           | .279**                  | 0.000           | .250**                  | 0.000           |
| Cooperation                               | Spearman correlation analysis | .169**                  | 0.000           | .374**                  | 0.000           | .392**                  | 0.000           | .411**                  | 0.000           |
| Quantities of co-management participation | Spearman correlation analysis | .198**                  | 0.000           | .373**                  | 0.000           | .400**                  | 0.000           | .418**                  | 0.000           |

*Supplementary Materials -Model S1 - A regression model recognitional equity and relevant independent variables*

| Model Summary                                                                                                                                   |       |          |                   |                            |               |
|-------------------------------------------------------------------------------------------------------------------------------------------------|-------|----------|-------------------|----------------------------|---------------|
| Model                                                                                                                                           | R     | R Square | Adjusted R Square | Std. Error of the Estimate | Durbin-Watson |
| 1                                                                                                                                               | .355a | .126     | .107              | .60479                     | 1.855         |
| a. Dependent Variable: recognitional equity                                                                                                     |       |          |                   |                            |               |
| b. Predictors: (Constant), Age, Education, Villages, Household size, Annual household income, Instruction, Consultation, Agreement, Cooperation |       |          |                   |                            |               |

| ANOVA                                                                                                                                           |            |                |     |             |       |       |
|-------------------------------------------------------------------------------------------------------------------------------------------------|------------|----------------|-----|-------------|-------|-------|
| Model                                                                                                                                           |            | Sum of Squares | df  | Mean Square | F     | Sig.  |
| 1                                                                                                                                               | Regression | 21.900         | 9   | 2.433       | 6.653 | .000b |
|                                                                                                                                                 | Residual   | 151.429        | 414 | .366        |       |       |
|                                                                                                                                                 | Total      | 173.329        | 423 |             |       |       |
| a. Dependent Variable: recognitional equity                                                                                                     |            |                |     |             |       |       |
| b. Predictors: (Constant), Age, Education, Villages, Household size, Annual household income, Instruction, Consultation, Agreement, Cooperation |            |                |     |             |       |       |

| Coefficients                                                                                                                                    |                         |                             |            |                           |        |      |                         |       |
|-------------------------------------------------------------------------------------------------------------------------------------------------|-------------------------|-----------------------------|------------|---------------------------|--------|------|-------------------------|-------|
| Model                                                                                                                                           |                         | Unstandardized Coefficients |            | Standardized Coefficients | t      | Sig. | Collinearity Statistics |       |
|                                                                                                                                                 |                         | B                           | Std. Error | Beta                      |        |      | Tolerance               | VIF   |
| 1                                                                                                                                               | (Constant)              | 2.625                       | .197       |                           | 13.300 | .000 |                         |       |
|                                                                                                                                                 | Age                     | .031                        | .029       | .062                      | 1.090  | .276 | .654                    | 1.529 |
|                                                                                                                                                 | education               | .102                        | .035       | .164                      | 2.887  | .004 | .651                    | 1.535 |
|                                                                                                                                                 | villages                | .058                        | .024       | .118                      | 2.457  | .014 | .914                    | 1.094 |
|                                                                                                                                                 | Household size          | .121                        | .047       | .121                      | 2.588  | .010 | .961                    | 1.041 |
|                                                                                                                                                 | Annual household income | .047                        | .028       | .086                      | 1.684  | .093 | .804                    | 1.243 |
|                                                                                                                                                 | Instruction             | .061                        | .038       | .086                      | 1.623  | .105 | .743                    | 1.345 |
|                                                                                                                                                 | Consultation            | .082                        | .037       | .130                      | 2.236  | .026 | .625                    | 1.600 |
|                                                                                                                                                 | Agreement               | -.073                       | .041       | -.097                     | -1.804 | .072 | .727                    | 1.376 |
|                                                                                                                                                 | Cooperation             | .089                        | .051       | .101                      | 1.763  | .079 | .637                    | 1.570 |
| a. Dependent Variable: recognitional equity                                                                                                     |                         |                             |            |                           |        |      |                         |       |
| b. Predictors: (Constant), Age, Education, Villages, Household size, Annual household income, Instruction, Consultation, Agreement, Cooperation |                         |                             |            |                           |        |      |                         |       |



*Supplementary Materials -Model S2 - A regression model procedural equity and relevant independent variables*

| Model Summary                                                                                                                   |       |          |                   |                            |               |
|---------------------------------------------------------------------------------------------------------------------------------|-------|----------|-------------------|----------------------------|---------------|
| Model                                                                                                                           | R     | R Square | Adjusted R Square | Std. Error of the Estimate | Durbin-Watson |
| 2                                                                                                                               | .535a | .286     | .272              | .75835                     | 1.919         |
| a. Dependent Variable: procedural equity                                                                                        |       |          |                   |                            |               |
| b. Predictors: (Constant), Age, Education, Annual household income, Forestry, Instruction, Consultation, Agreement, Cooperation |       |          |                   |                            |               |

| ANOVA                                                                                                                           |            |                |     |             |        |       |
|---------------------------------------------------------------------------------------------------------------------------------|------------|----------------|-----|-------------|--------|-------|
| Model                                                                                                                           |            | Sum of Squares | df  | Mean Square | F      | Sig.  |
| 2                                                                                                                               | Regression | 95.493         | 8   | 11.937      | 20.756 | .000b |
|                                                                                                                                 | Residual   | 238.666        | 415 | .575        |        |       |
|                                                                                                                                 | Total      | 334.160        | 423 |             |        |       |
| a. Dependent Variable: procedural equity                                                                                        |            |                |     |             |        |       |
| b. Predictors: (Constant), Age, Education, Annual household income, Forestry, Instruction, Consultation, Agreement, Cooperation |            |                |     |             |        |       |

| Coefficients                                                                                                                    |                         |                             |            |                           |        |      |                         |       |
|---------------------------------------------------------------------------------------------------------------------------------|-------------------------|-----------------------------|------------|---------------------------|--------|------|-------------------------|-------|
| Model                                                                                                                           |                         | Unstandardized Coefficients |            | Standardized Coefficients | t      | Sig. | Collinearity Statistics |       |
|                                                                                                                                 |                         | B                           | Std. Error | Beta                      |        |      | Tolerance               | VIF   |
| 2                                                                                                                               | (Constant)              | 1.893                       | .210       |                           | 9.034  | .000 |                         |       |
|                                                                                                                                 | Age                     | .031                        | .036       | .044                      | .860   | .390 | .657                    | 1.521 |
|                                                                                                                                 | education               | .142                        | .045       | .165                      | 3.182  | .002 | .640                    | 1.562 |
|                                                                                                                                 | Annual household income | -.046                       | .034       | -.062                     | -1.360 | .175 | .840                    | 1.190 |
|                                                                                                                                 | Forestry                | .215                        | .206       | .049                      | 1.043  | .298 | .787                    | 1.271 |
|                                                                                                                                 | Instruction             | .052                        | .047       | .052                      | 1.090  | .276 | .748                    | 1.336 |
|                                                                                                                                 | Consultation            | .248                        | .046       | .283                      | 5.371  | .000 | .621                    | 1.611 |
|                                                                                                                                 | Agreement               | -.040                       | .052       | -.038                     | -.766  | .444 | .709                    | 1.410 |
|                                                                                                                                 | Cooperation             | .314                        | .064       | .257                      | 4.876  | .000 | .620                    | 1.614 |
| a. Dependent Variable: procedural equity                                                                                        |                         |                             |            |                           |        |      |                         |       |
| b. Predictors: (Constant), Age, Education, Annual household income, Forestry, Instruction, Consultation, Agreement, Cooperation |                         |                             |            |                           |        |      |                         |       |

*Supplementary Materials -Model S3 - A regression model distributional equity and relevant independent variables*

| Model Summary |       |          |                   |                            |               |
|---------------|-------|----------|-------------------|----------------------------|---------------|
| Model         | R     | R Square | Adjusted R Square | Std. Error of the Estimate | Durbin-Watson |
| 3             | .535a | .286     | .270              | .61367                     | 1.914         |

a. Dependent Variable: distributional equity

b. Predictors: (Constant), Age, Education, Annual household income, Tourism ,Forestry, Instruction, Consultation, Agreement, Cooperation

| ANOVA                                                                                                                                  |            |                |     |             |        |       |
|----------------------------------------------------------------------------------------------------------------------------------------|------------|----------------|-----|-------------|--------|-------|
| Model                                                                                                                                  |            | Sum of Squares | df  | Mean Square | F      | Sig.  |
| 3                                                                                                                                      | Regression | 62.442         | 9   | 6.938       | 18.423 | .000b |
|                                                                                                                                        | Residual   | 155.906        | 414 | .377        |        |       |
|                                                                                                                                        | Total      | 218.349        | 423 |             |        |       |
| a. Dependent Variable: distributional equity                                                                                           |            |                |     |             |        |       |
| b. Predictors: (Constant), Age, Education, Annual household income, Tourism, Ranger, Instruction, Consultation, Agreement, Cooperation |            |                |     |             |        |       |

| Coefficients                                                                                                                           |                         |                             |            |                           |        |      |                         |       |
|----------------------------------------------------------------------------------------------------------------------------------------|-------------------------|-----------------------------|------------|---------------------------|--------|------|-------------------------|-------|
| Model                                                                                                                                  |                         | Unstandardized Coefficients |            | Standardized Coefficients | t      | Sig. | Collinearity Statistics |       |
|                                                                                                                                        |                         | B                           | Std. Error | Beta                      |        |      | Tolerance               | VIF   |
| 3                                                                                                                                      | (Constant)              | 2.249                       | .172       |                           | 13.054 | .000 |                         |       |
|                                                                                                                                        | Age                     | .009                        | .029       | .015                      | .293   | .770 | .654                    | 1.530 |
|                                                                                                                                        | education               | .045                        | .036       | .066                      | 1.259  | .209 | .636                    | 1.572 |
|                                                                                                                                        | Annual household income | .018                        | .029       | .030                      | .620   | .536 | .743                    | 1.345 |
|                                                                                                                                        | Tourism                 | .092                        | .089       | .048                      | 1.031  | .303 | .806                    | 1.240 |
|                                                                                                                                        | Forestry                | -.014                       | .167       | -.004                     | -.082  | .934 | .786                    | 1.272 |
|                                                                                                                                        | Instruction             | .079                        | .039       | .100                      | 2.055  | .041 | .734                    | 1.362 |
|                                                                                                                                        | Consultation            | .090                        | .037       | .127                      | 2.413  | .016 | .621                    | 1.611 |
|                                                                                                                                        | Agreement               | .088                        | .042       | .104                      | 2.095  | .037 | .702                    | 1.425 |
|                                                                                                                                        | Cooperation             | .296                        | .052       | .300                      | 5.689  | .000 | .619                    | 1.615 |
| a. Dependent Variable: distributional equity                                                                                           |                         |                             |            |                           |        |      |                         |       |
| b. Predictors: (Constant), Age, Education, Annual household income, Tourism, Ranger, Instruction, Consultation, Agreement, Cooperation |                         |                             |            |                           |        |      |                         |       |

*Supplementary Materials -Model S4 - A regression model combined social equity and relevant independent variables*

| Model Summary                                                                                                                            |       |          |                   |                            |               |
|------------------------------------------------------------------------------------------------------------------------------------------|-------|----------|-------------------|----------------------------|---------------|
| Model                                                                                                                                    | R     | R Square | Adjusted R Square | Std. Error of the Estimate | Durbin-Watson |
| 4                                                                                                                                        | .580a | .336     | .321              | .47910                     | 1.802         |
| a. Dependent Variable: combined social equity                                                                                            |       |          |                   |                            |               |
| b. Predictors: (Constant), Age, Education, Annual household income, Tourism, Forestry, Instruction, Consultation, Agreement, Cooperation |       |          |                   |                            |               |

| ANOVA                                                                                                                                     |            |                |     |             |        |       |
|-------------------------------------------------------------------------------------------------------------------------------------------|------------|----------------|-----|-------------|--------|-------|
| Model                                                                                                                                     |            | Sum of Squares | df  | Mean Square | F      | Sig.  |
| 4                                                                                                                                         | Regression | 48.051         | 9   | 5.339       | 23.260 | .000b |
|                                                                                                                                           | Residual   | 95.029         | 414 | .230        |        |       |
|                                                                                                                                           | Total      | 143.080        | 423 |             |        |       |
| a. Dependent Variable: combined social equity                                                                                             |            |                |     |             |        |       |
| b. Predictors: (Constant), Age, Education, Annual household income, Tourism , Forestry, Instruction, Consultation, Agreement, Cooperation |            |                |     |             |        |       |

| Coefficients                                                                                                                             |                         |                             |            |                           |        |      |                         |       |
|------------------------------------------------------------------------------------------------------------------------------------------|-------------------------|-----------------------------|------------|---------------------------|--------|------|-------------------------|-------|
| Model                                                                                                                                    |                         | Unstandardized Coefficients |            | Standardized Coefficients | t      | Sig. | Collinearity Statistics |       |
|                                                                                                                                          |                         | B                           | Std. Error | Beta                      |        |      | Tolerance               | VIF   |
| 4                                                                                                                                        | (Constant)              | 2.377                       | .134       |                           | 17.677 | .000 |                         |       |
|                                                                                                                                          | Age                     | .020                        | .023       | .044                      | .882   | .378 | .654                    | 1.530 |
|                                                                                                                                          | education               | .094                        | .028       | .167                      | 3.334  | .001 | .636                    | 1.572 |
|                                                                                                                                          | Annual household income | .015                        | .023       | .030                      | .657   | .512 | .743                    | 1.345 |
|                                                                                                                                          | Tourism                 | -.022                       | .069       | -.014                     | -.315  | .753 | .806                    | 1.240 |
|                                                                                                                                          | Forestry                | -.064                       | .130       | -.022                     | -.491  | .624 | .786                    | 1.272 |
|                                                                                                                                          | Instruction             | .070                        | .030       | .108                      | 2.314  | .021 | .734                    | 1.362 |
|                                                                                                                                          | Consultation            | .139                        | .029       | .243                      | 4.787  | .000 | .621                    | 1.611 |
|                                                                                                                                          | Agreement               | -.002                       | .033       | -.004                     | -.073  | .942 | .702                    | 1.425 |
|                                                                                                                                          | Cooperation             | .236                        | .041       | .295                      | 5.794  | .000 | .619                    | 1.615 |
| a. Dependent Variable: combined social equity                                                                                            |                         |                             |            |                           |        |      |                         |       |
| b. Predictors: (Constant), Age, Education, Annual household income, Tourism, Forestry, Instruction, Consultation, Agreement, Cooperation |                         |                             |            |                           |        |      |                         |       |
